# Supplementary material for: Room-temperature discotic liquid crystals based on oligothiophenes—attached and fused triazatruxenes
Source: Royal Society of Chemistry journal article supplement (doi:10.1039/b913930c), 2009-01-01
Supplement: b913930c.pdf [file b913930c.pdf]

# Room-temperature Discotic Liquid Crystals Based On Oligothiophenes – Attached and Fused Triazatruxenes

Jing Luo, Baomin Zhao, Jinjun Shao, Kheng Aik Lim, Hardy Sze On Chan, Chunyan Chi\*

*Department of Chemistry, National University of Singapore, 3 Science Drive 3, Singapore*

Corresponding author: [chmcc@nus.edu.sg](mailto:chmcc@nus.edu.sg)

| <b>Table of Contents</b>                                                                    | <b>Page</b> |
|---------------------------------------------------------------------------------------------|-------------|
| <sup>1</sup> H NMR, <sup>13</sup> C NMR and MALDI-TOF mass spectra of <b>TAT-T1</b> .....   | 2-5         |
| <sup>1</sup> H NMR, <sup>13</sup> C NMR and MALDI-TOF mass spectra of <b>TAT-T2</b> .....   | 6-9         |
| <sup>1</sup> H NMR, <sup>13</sup> C NMR and MALDI-TOF mass spectra of <b>TAT-T1-C</b> ..... | 10-13       |
| POM images of <b>TAT-T2</b> at different temperatures .....                                 | 14          |

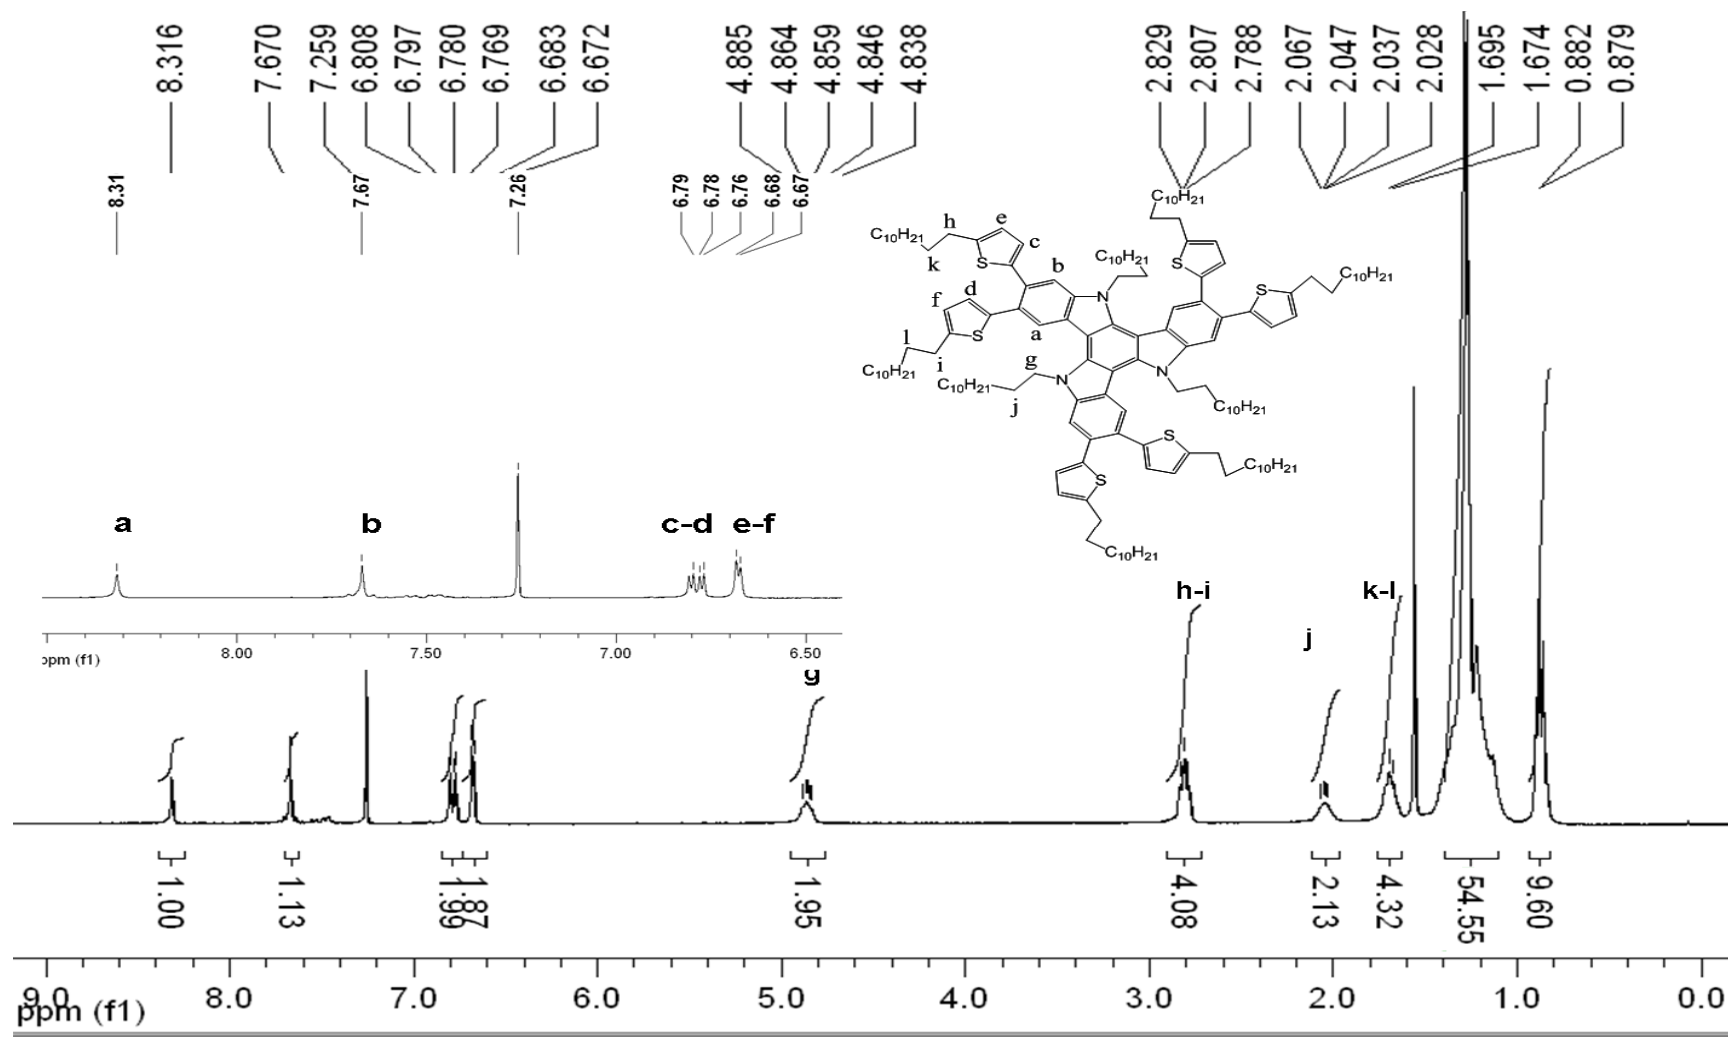

Figure 1.  $^1\text{H}$  NMR spectrum of TAT-T1 (in  $\text{CDCl}_3$ ).

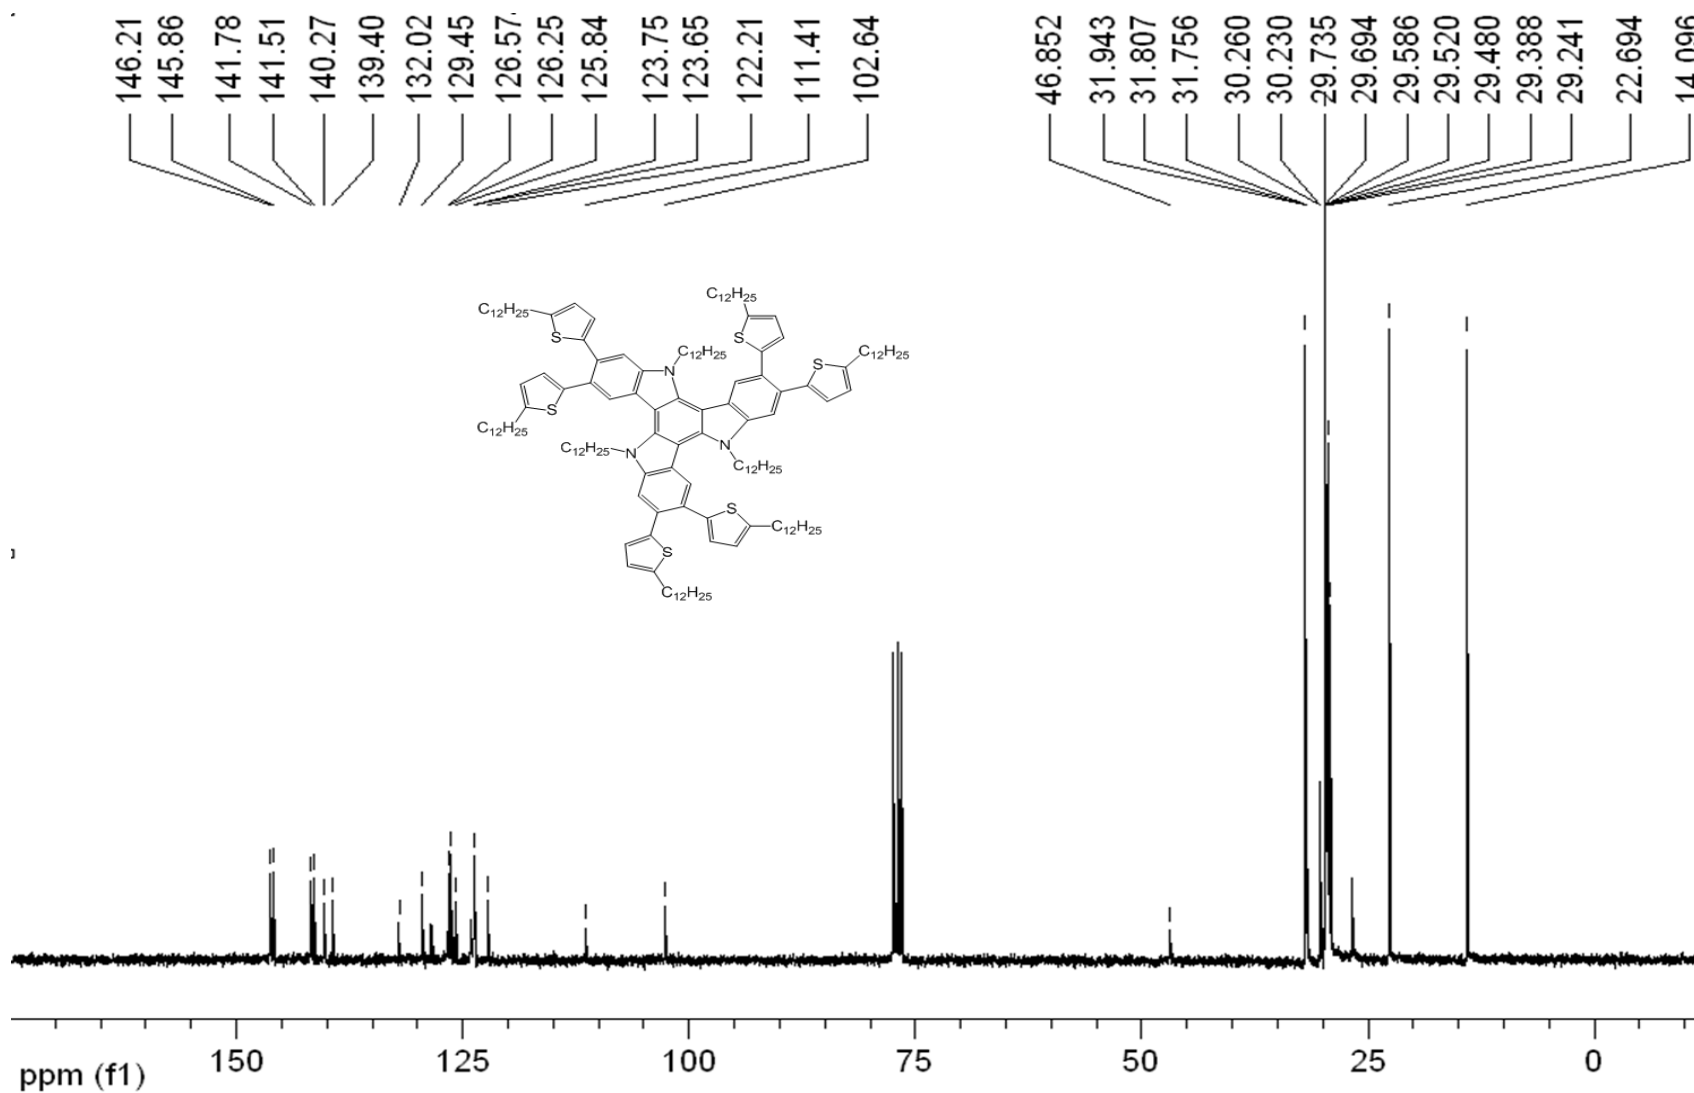

Figure 2a.  $^{13}\text{C}$  NMR spectrum of TAT-T1 (in  $\text{CDCl}_3$ ).

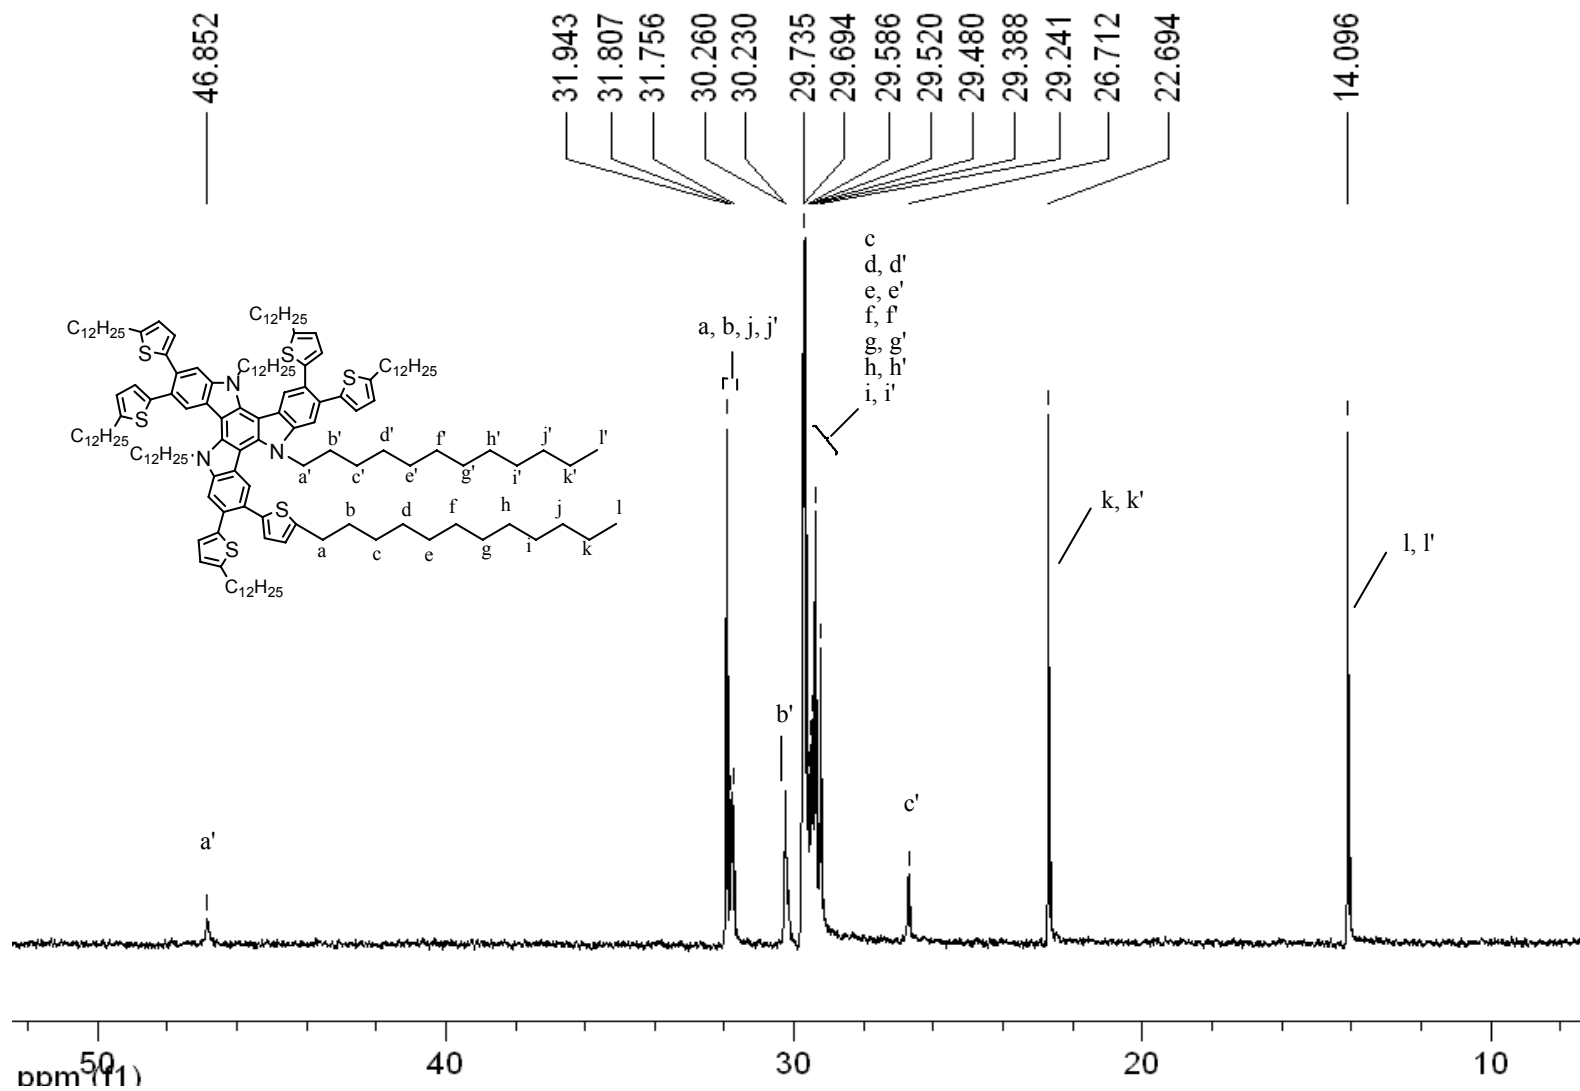

Figure 2b. Magnified area 10 - 50 ppm of  $^{13}\text{C}$  NMR spectrum of TAT-T1 (in  $\text{CDCl}_3$ ).

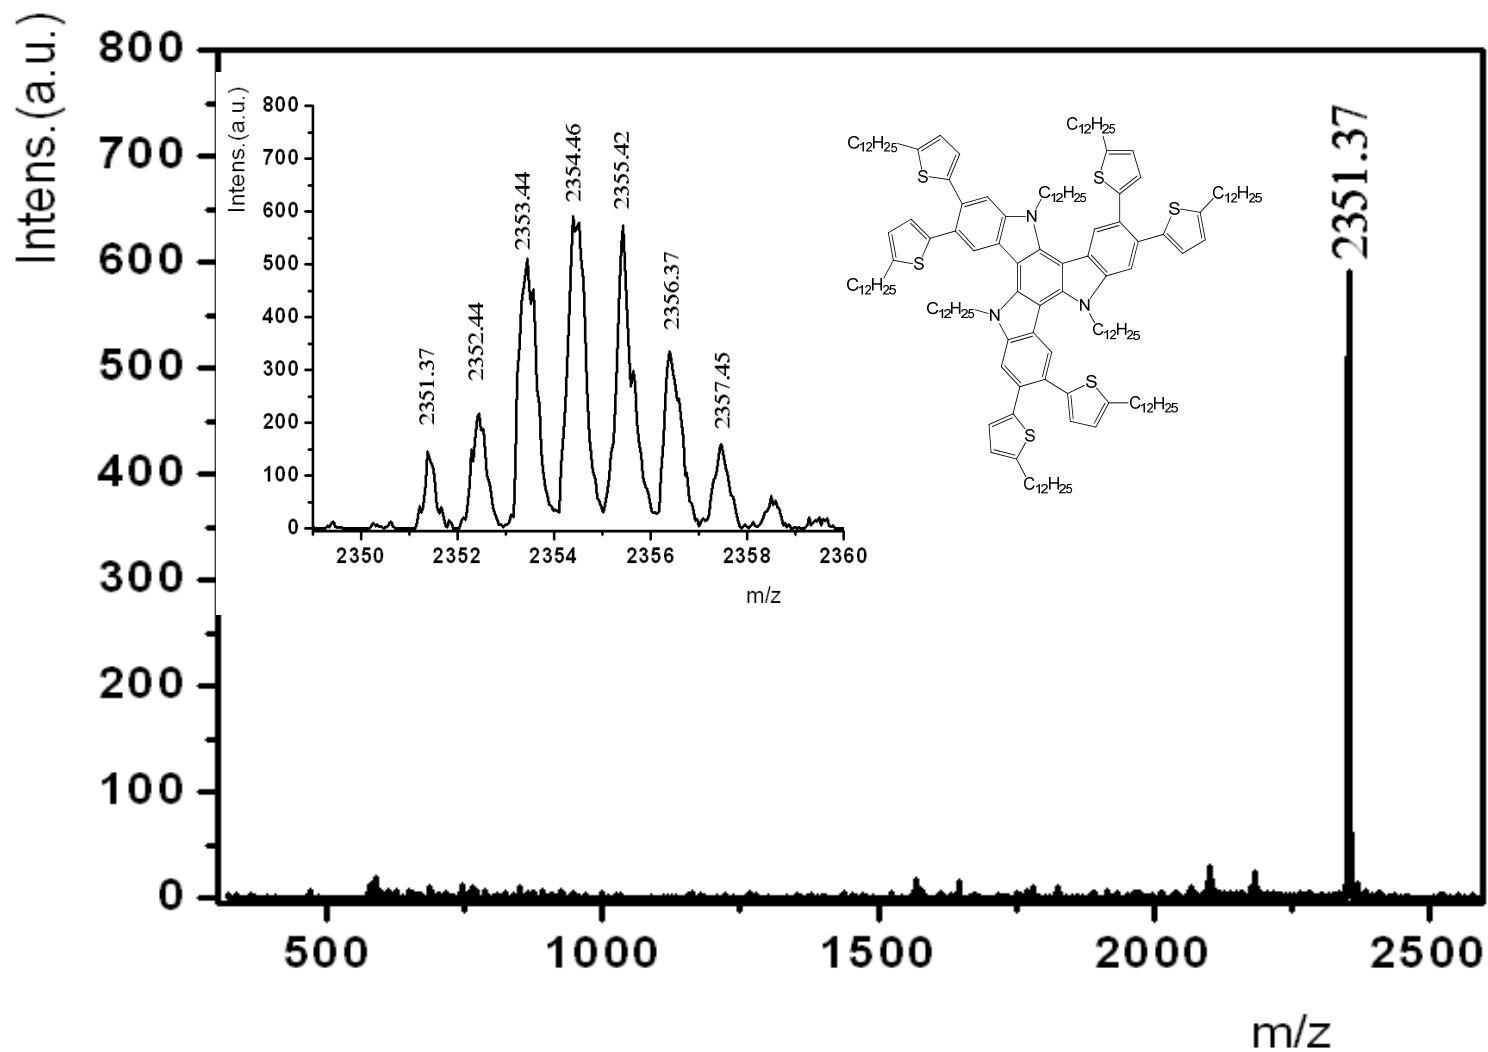

**Figure 3. MALDI-TOF mass spectrum of TAT-T1.**

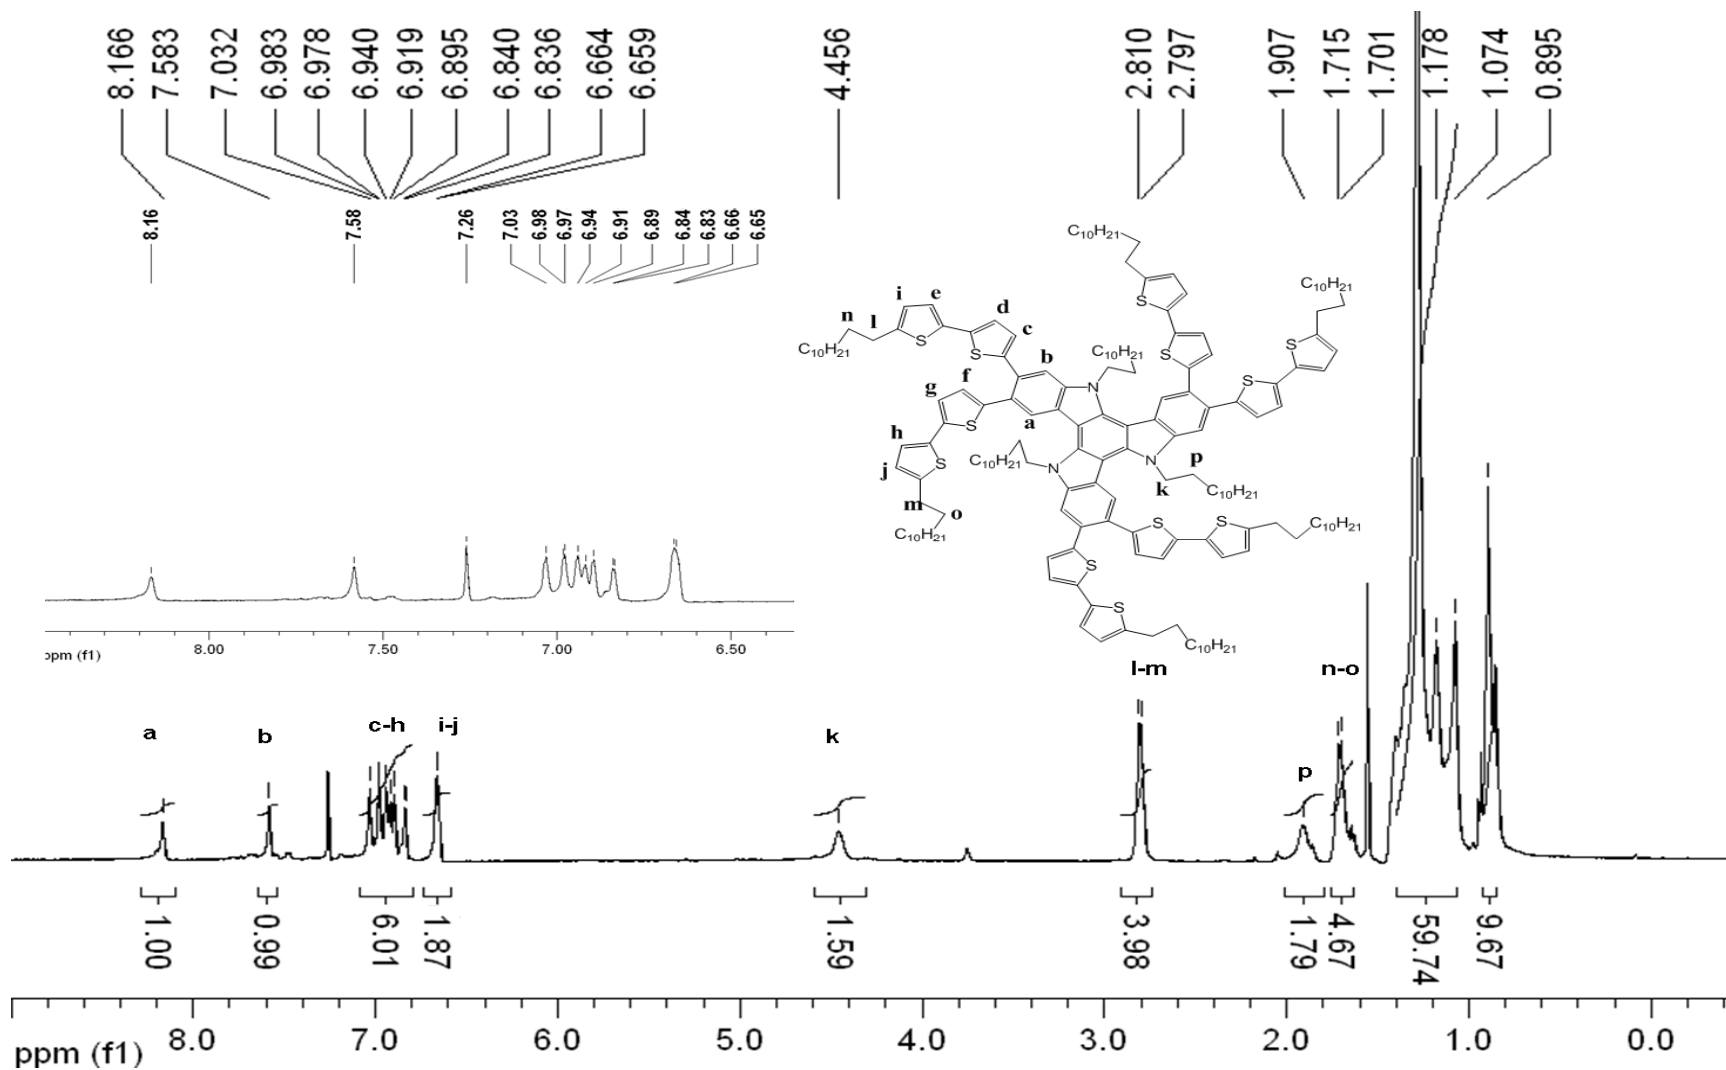

Figure 4.  $^1\text{H}$  NMR spectrum of TAT-T2 (in  $\text{CDCl}_3$ ).

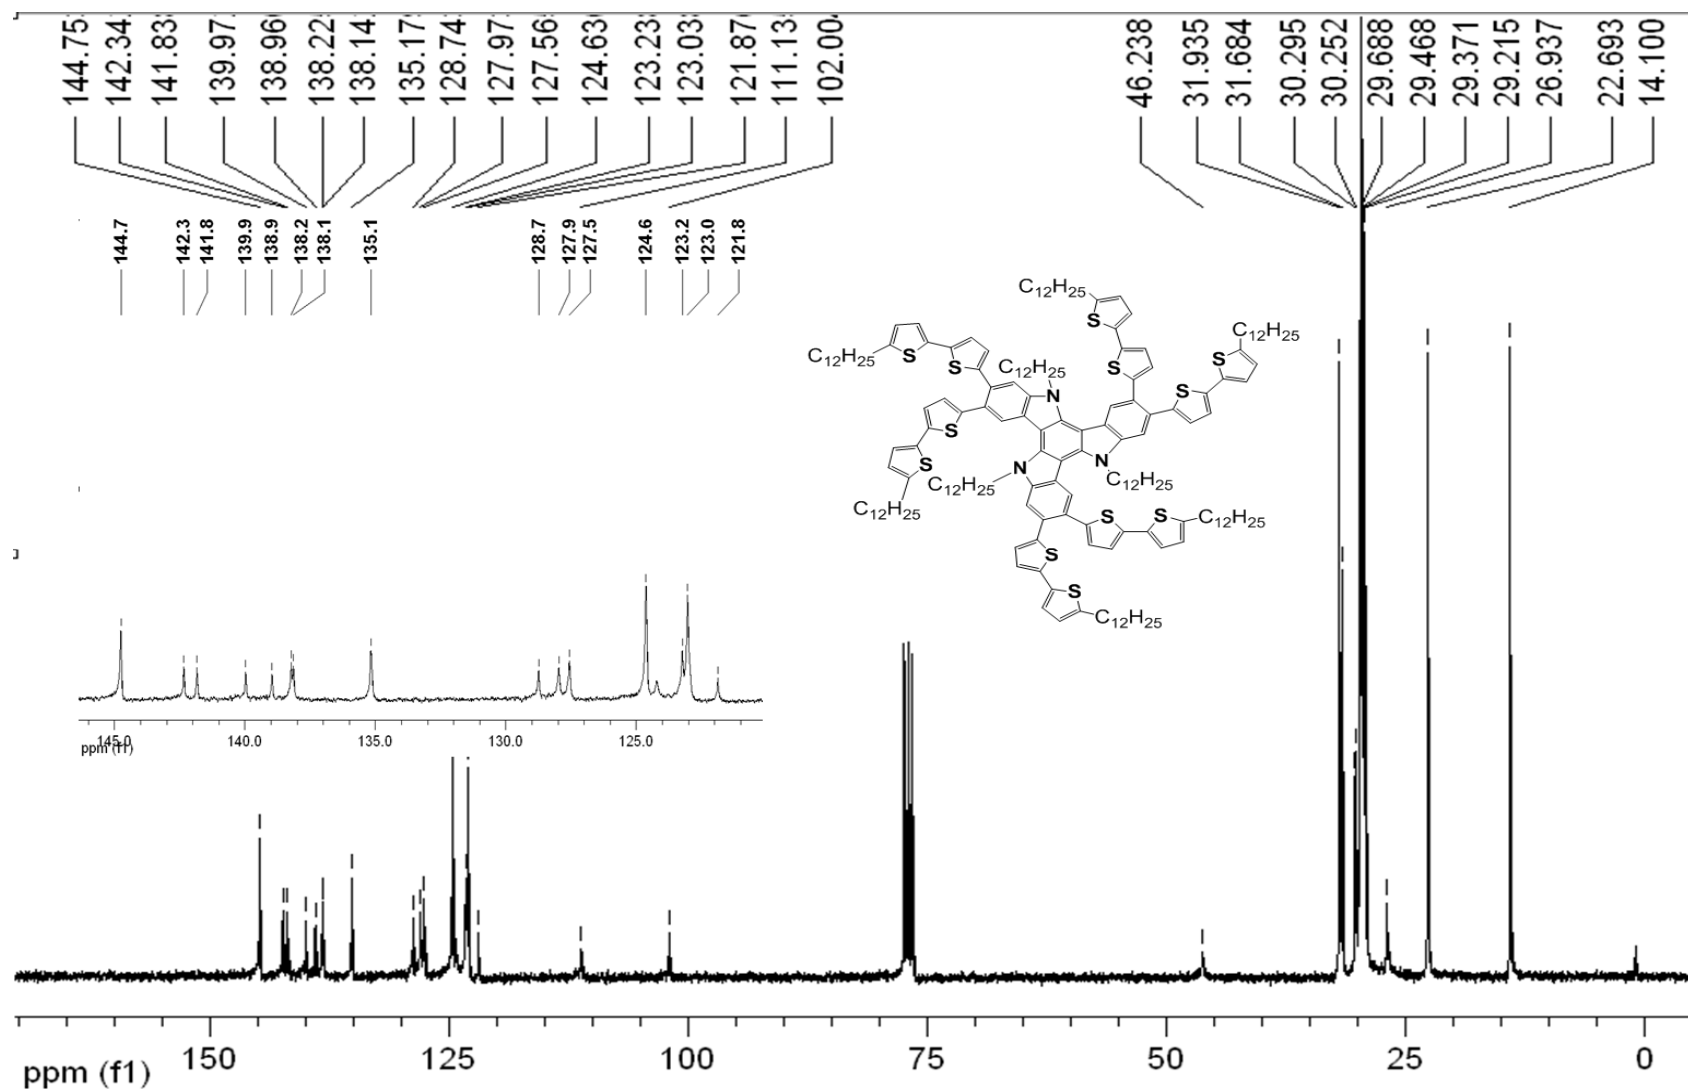

Figure 5a.  $^{13}\text{C}$  NMR spectrum of TAT-T2 (in  $\text{CDCl}_3$ ).

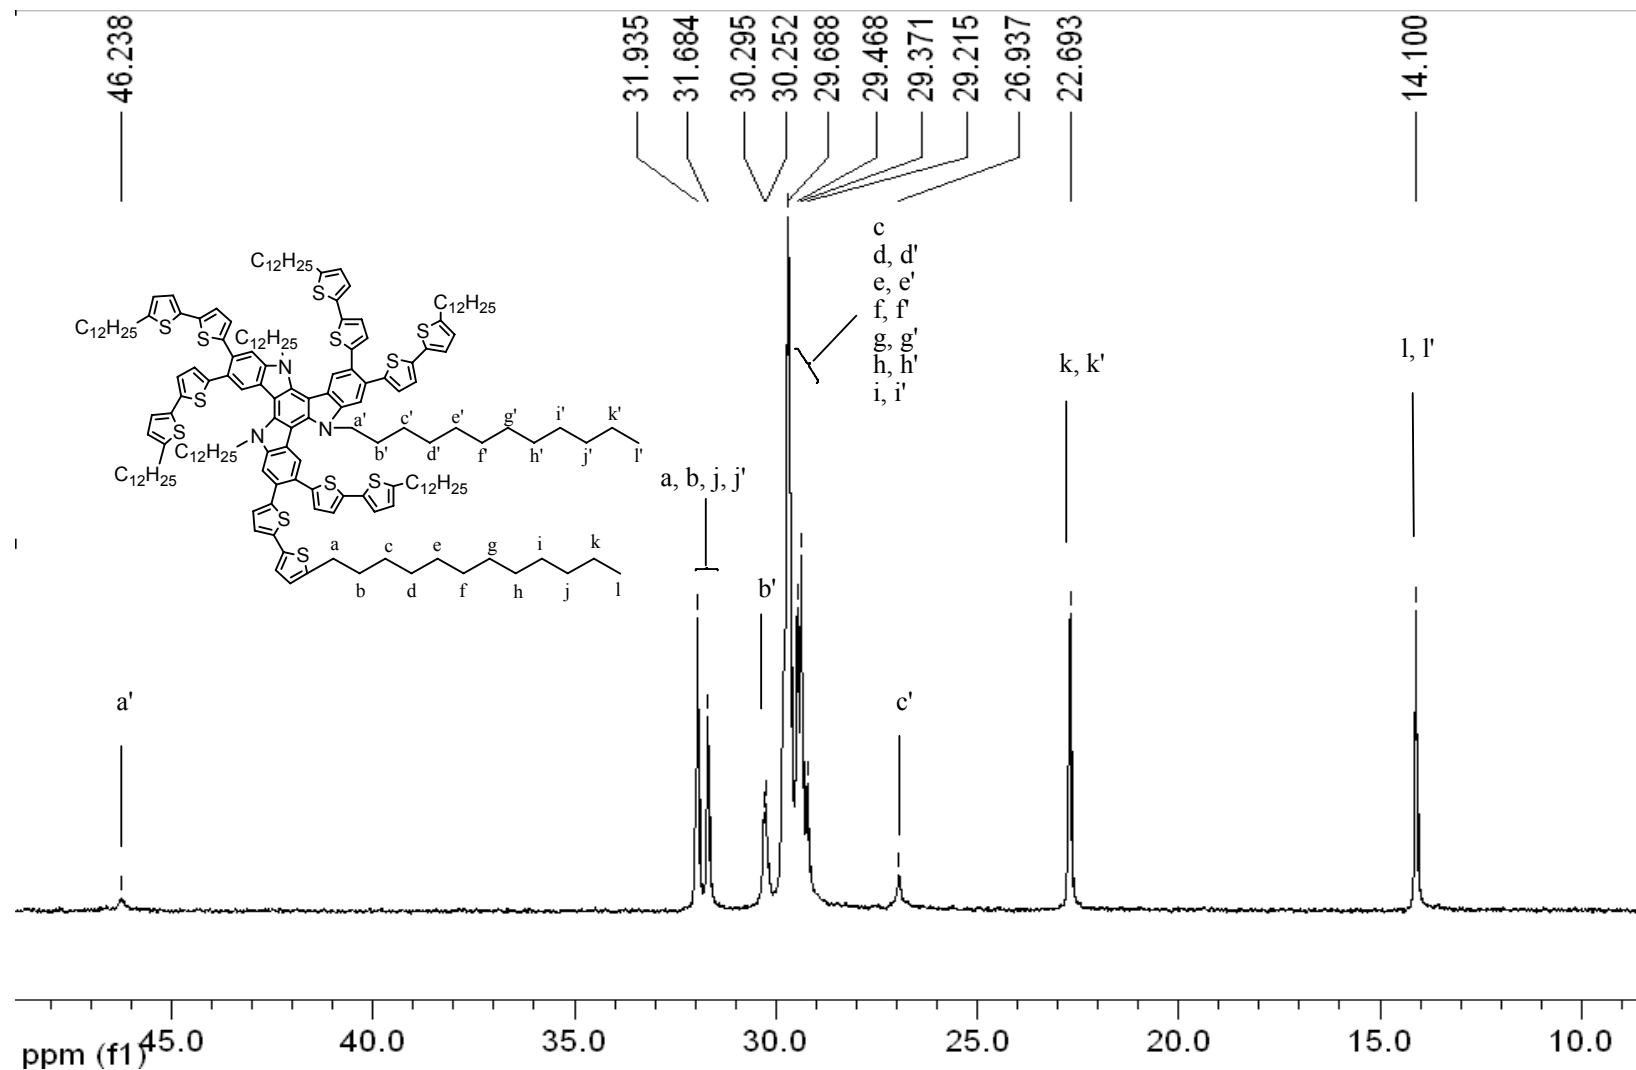

**Figure 5b. Magnified area 10 - 48 ppm of  $^{13}\text{C}$  NMR spectrum of TAT-T2 (in  $\text{CDCl}_3$ ).**

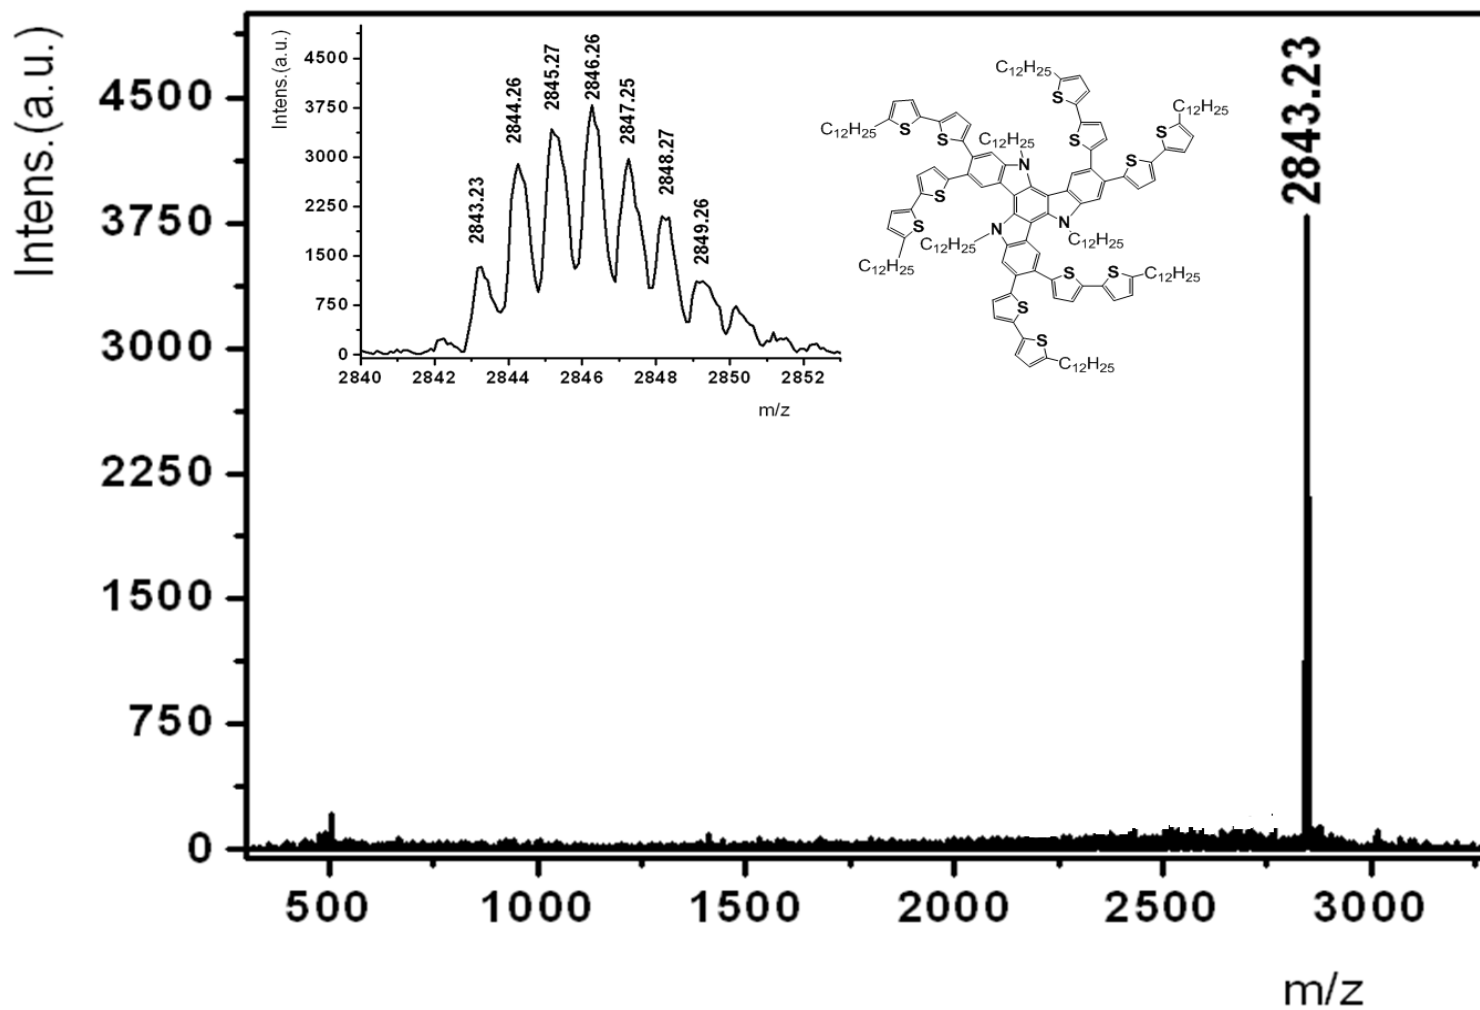

**Figure 6. MALDI-TOF mass spectrum of TAT-T2.**

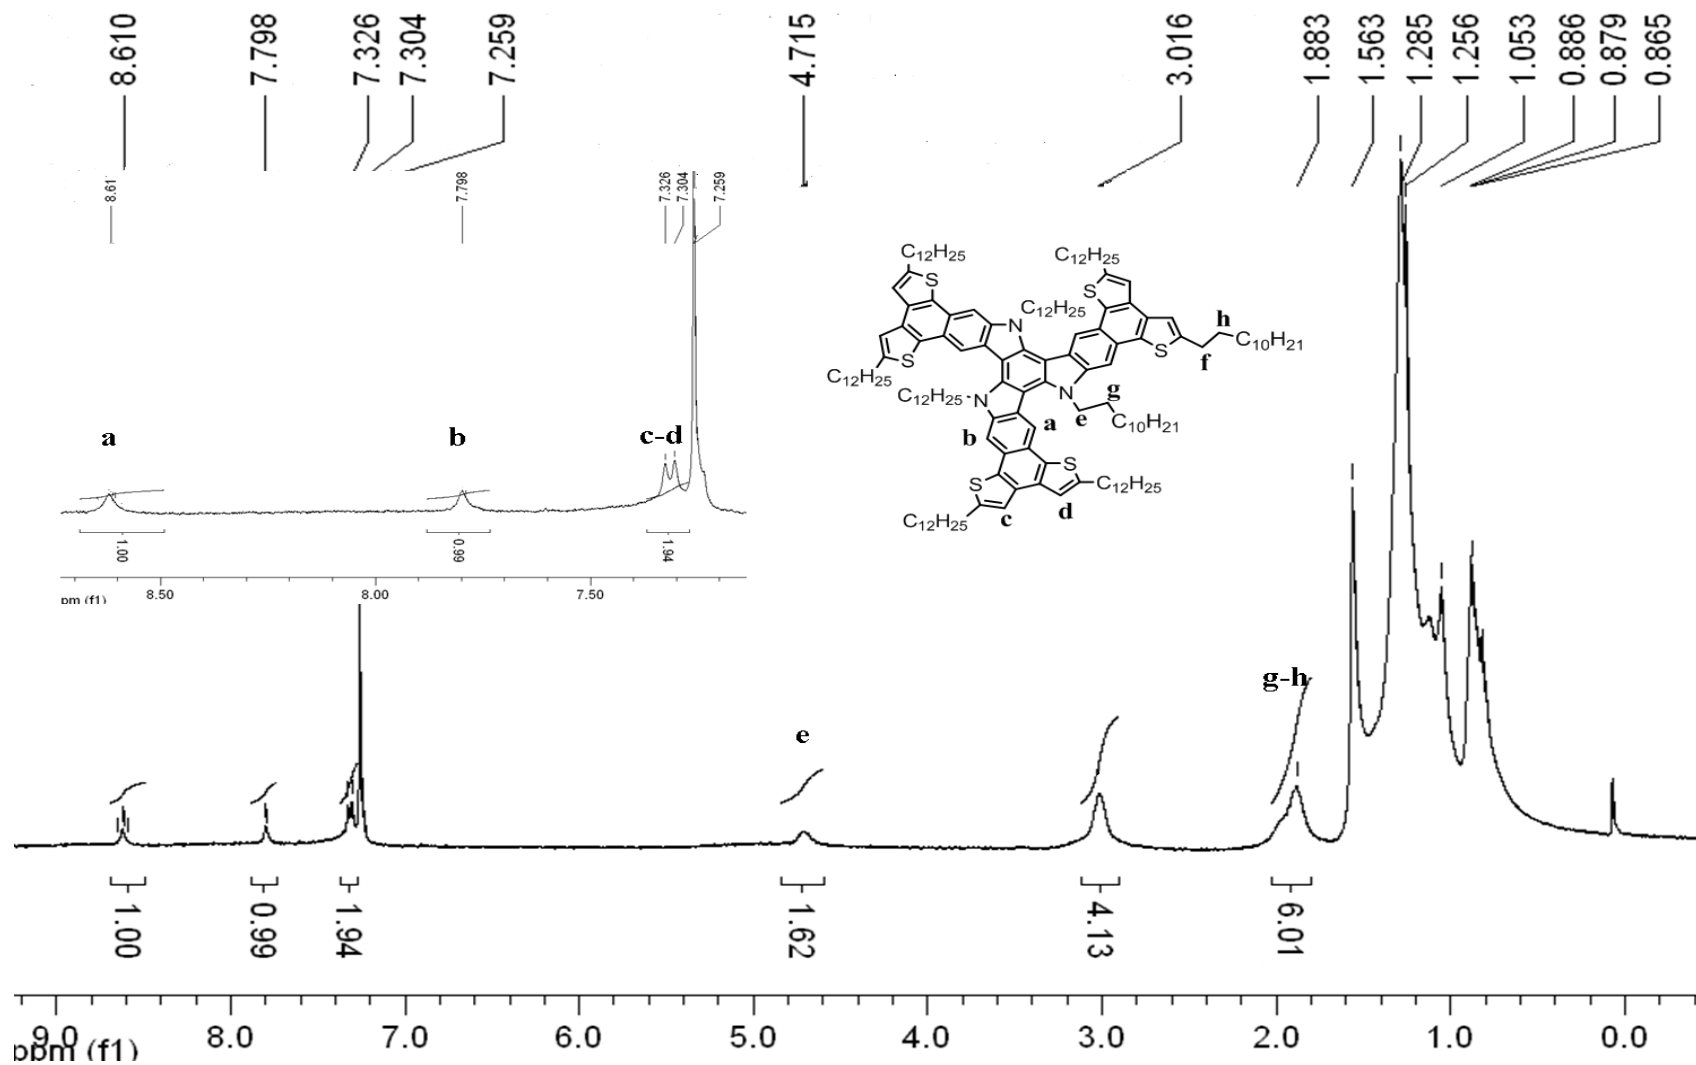

Figure 7.  $^1\text{H}$  NMR spectrum of TAT-T1-C (in  $\text{CDCl}_3$ ).

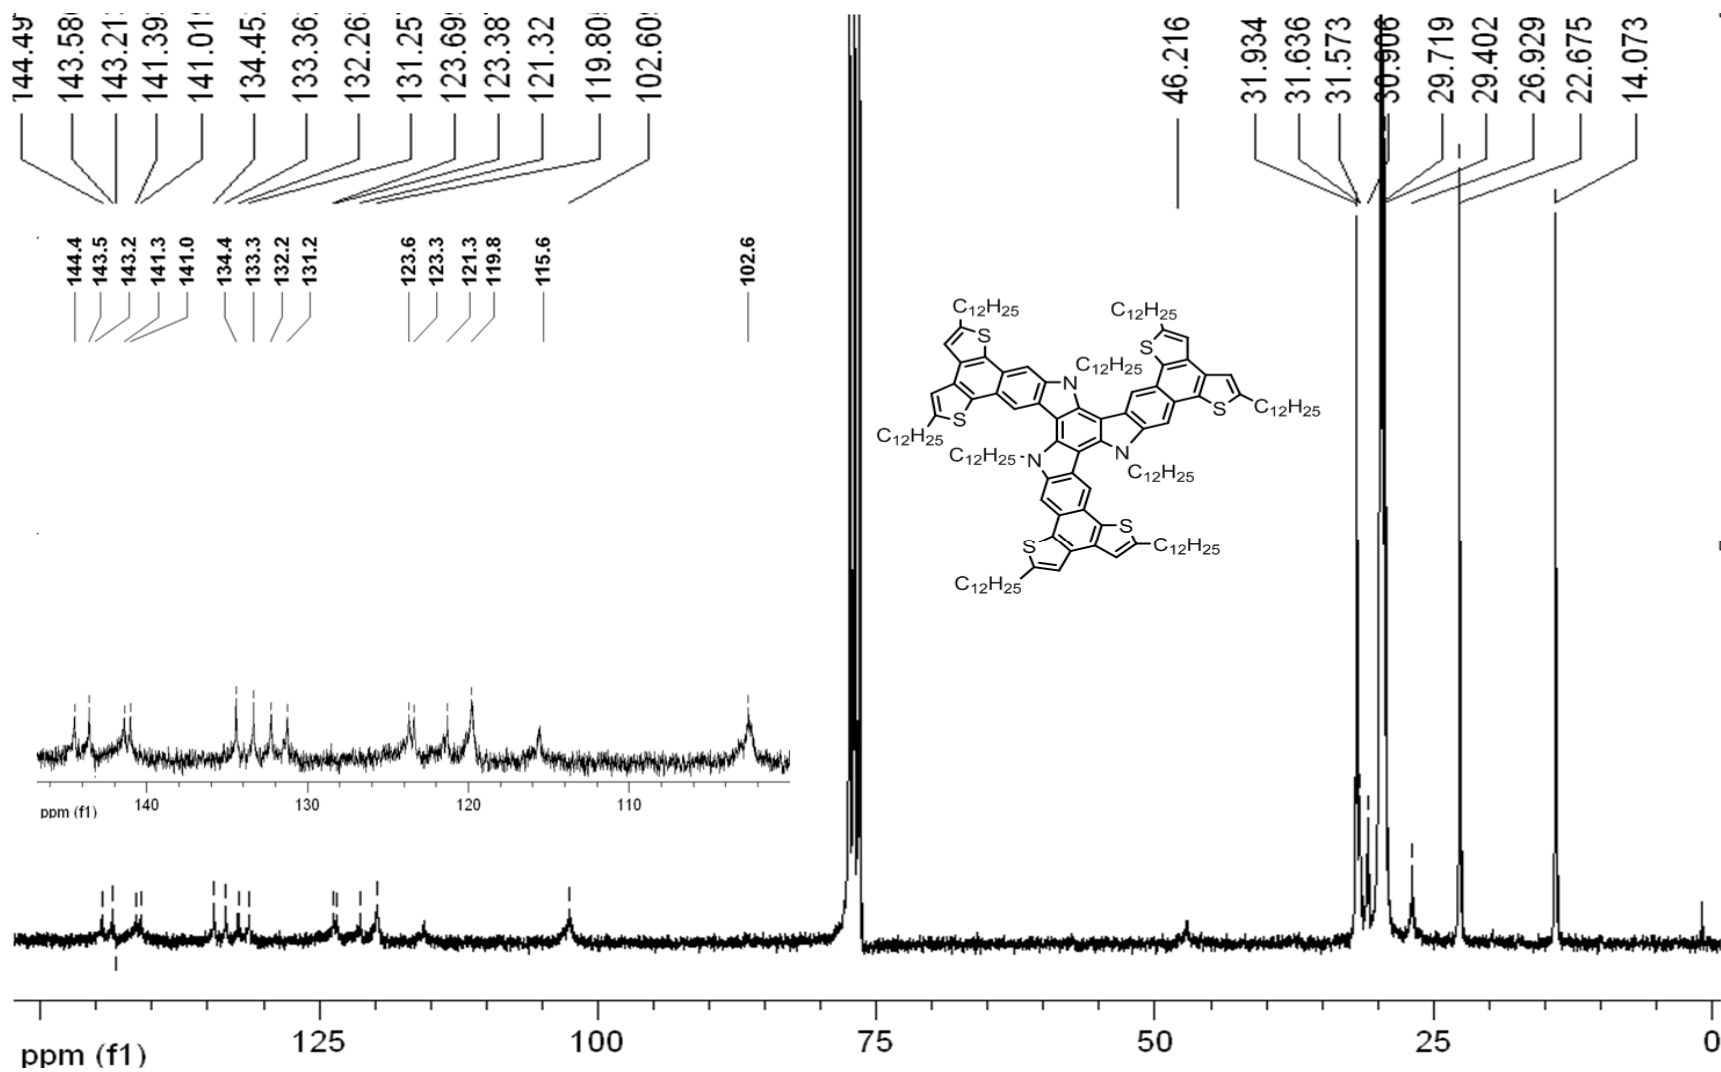

Figure 8a.  $^{13}\text{C}$  NMR spectrum of TAT-T1-C (in  $\text{CDCl}_3$ ).

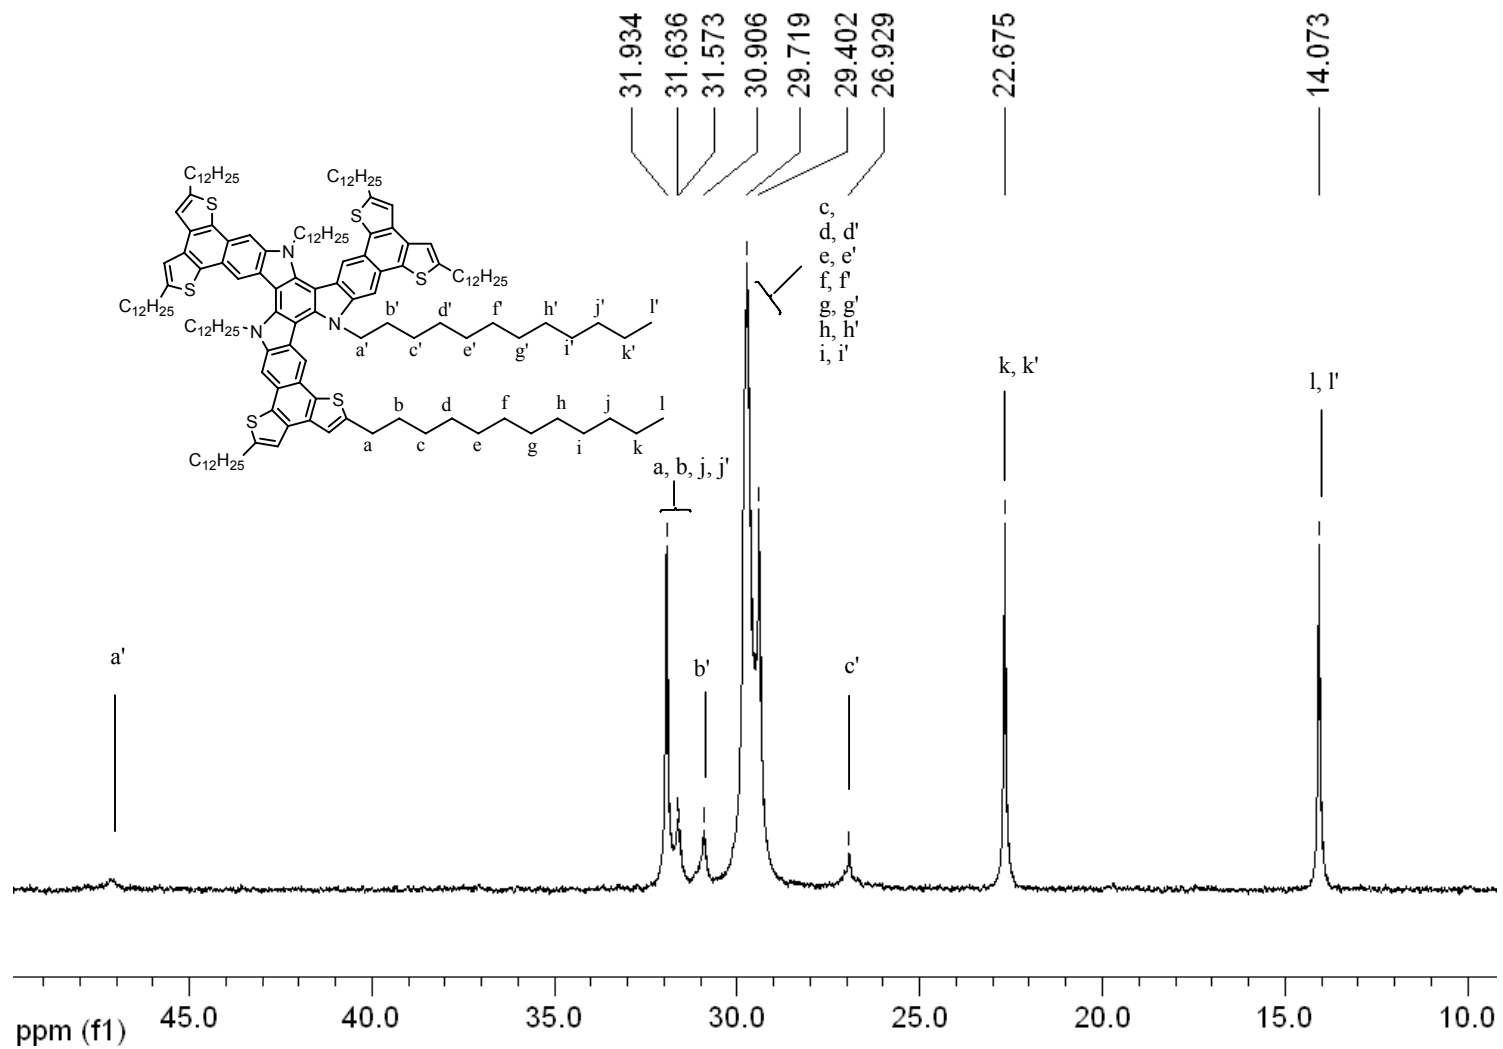

**Figure 8b. Magnified area 10 - 50 ppm of  $^{13}\text{C}$  NMR spectrum of TAT-T1-C (in  $\text{CDCl}_3$ ).**

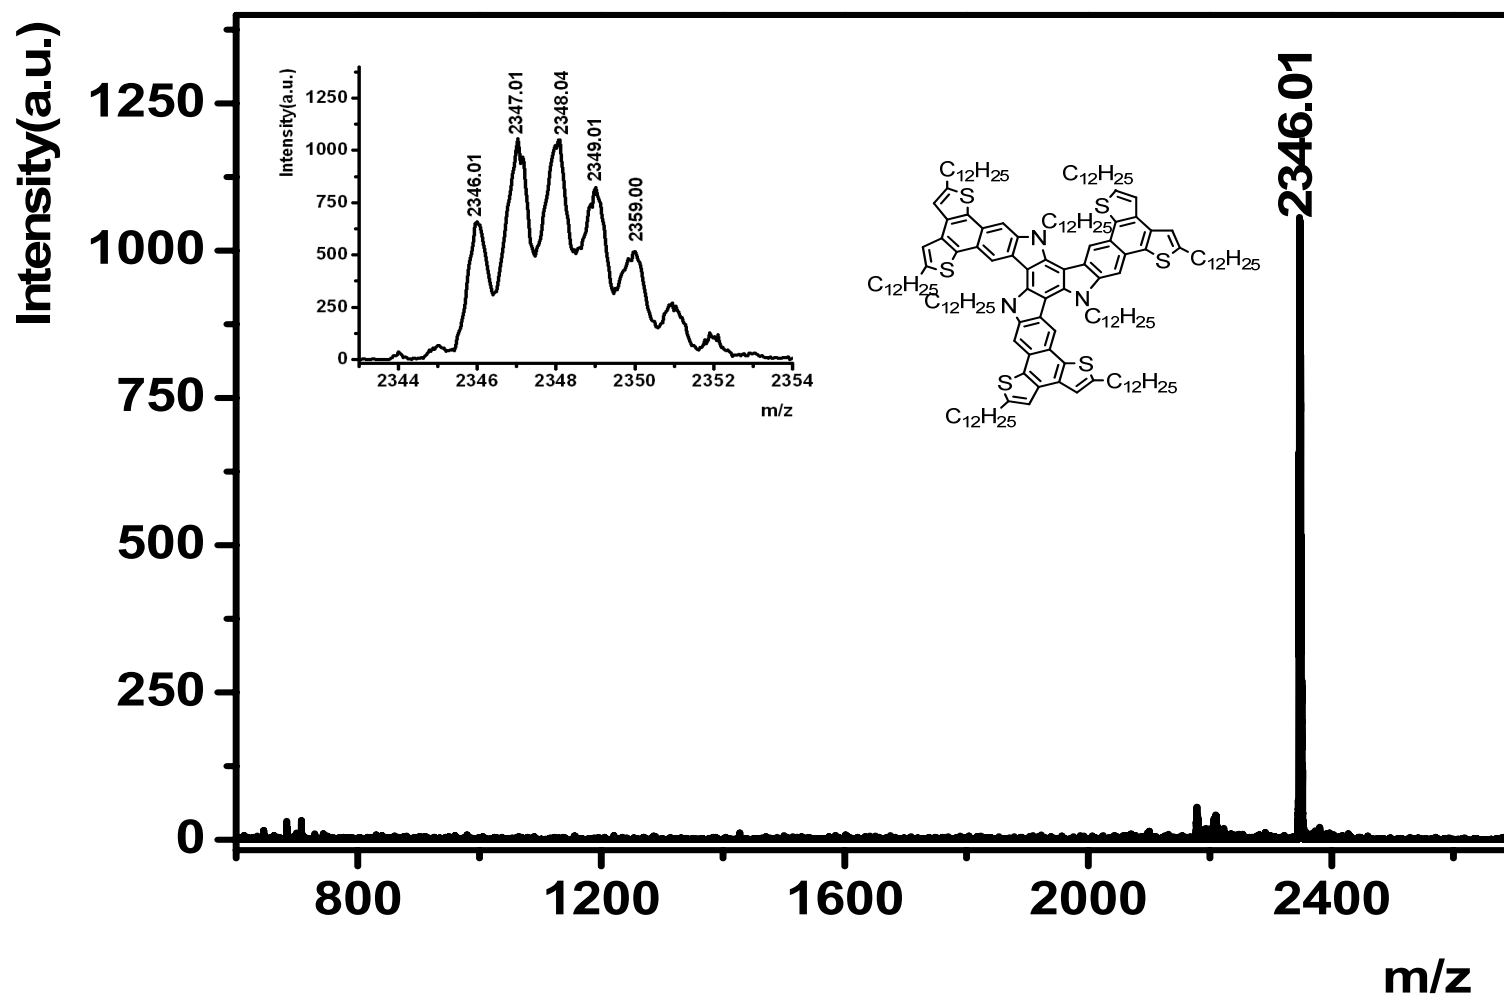

Figure 9. MALDI-TOF mass spectrum of TAT-T1-C.

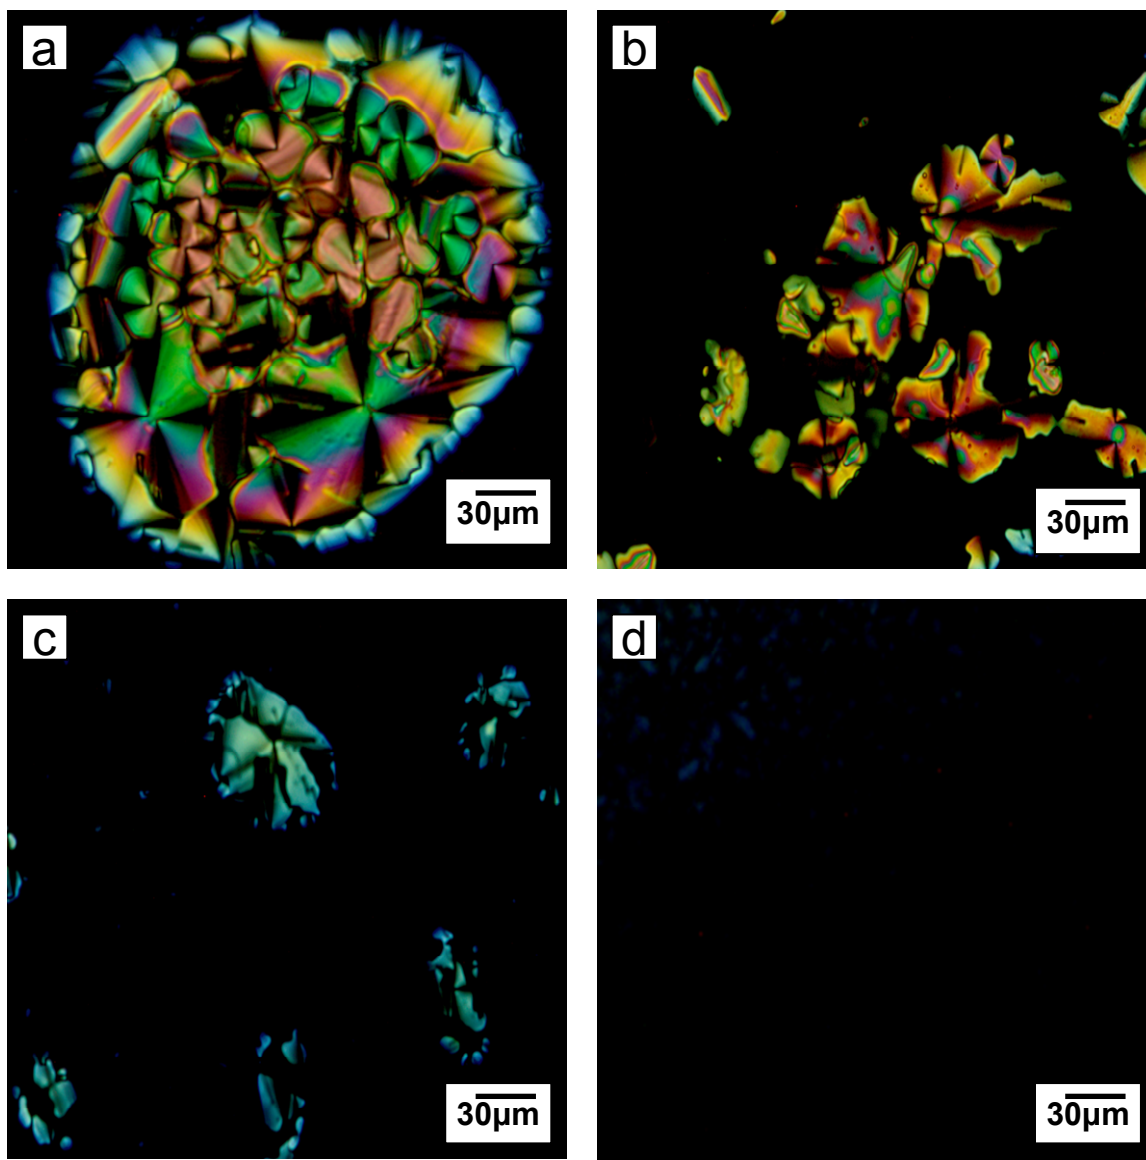

**Figure 10.** POM images of TAT-T2 at 100 °C (a), 155 °C (b), 167 °C (c), 170 °C (d).
